# Supplementary figures and images for: Vascular Growth Factor Inhibition with Bevacizumab Improves Cardiac Electrical Alterations and Fibrosis in Experimental Acute Chagas Disease
Source: MDPI journal article supplement (doi:10.3390/biology12111414), 2023-11-10

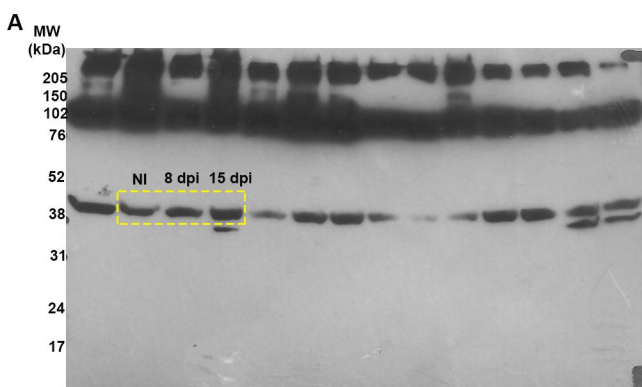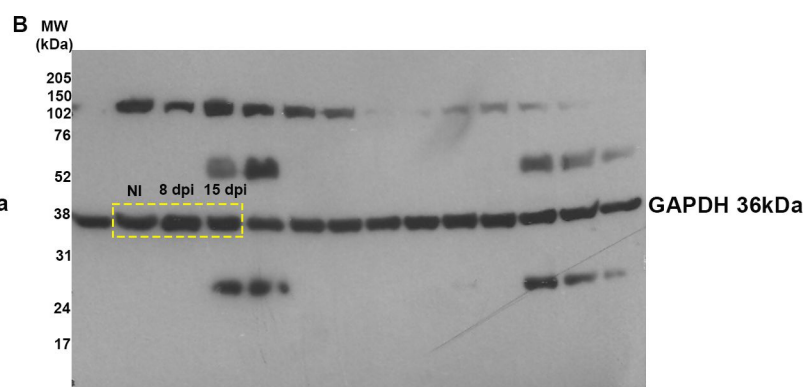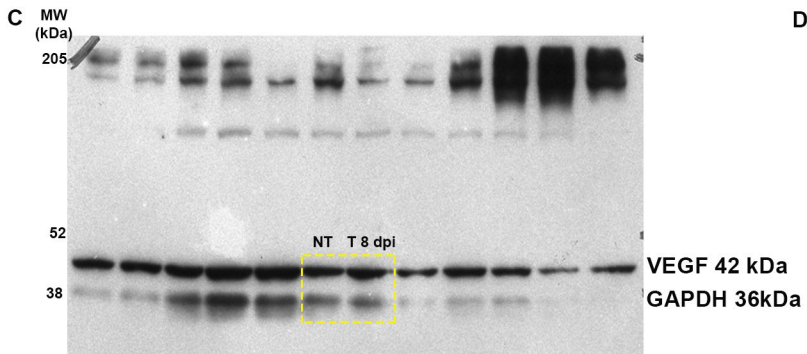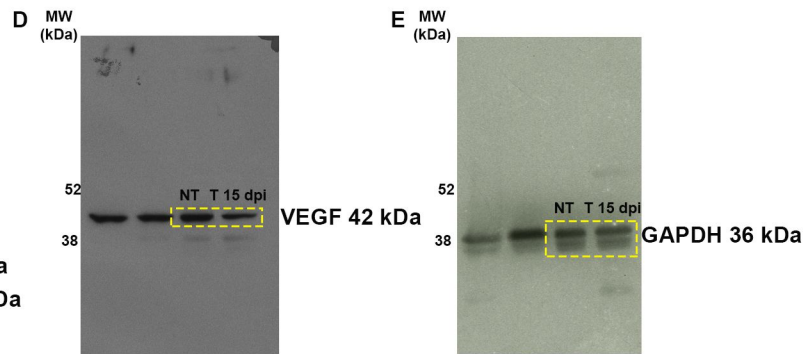

Supplement: s1 [file s1]
